# Supplementary material
Source: publisher figshare collection journal article supplement (https://diabetesjournals.figshare.com/ndownloader/files/35027560)
Supplement: Supplementary file 1 [file 35027560]

**Supplemental Table 1. ApoM-induced Risk Ratios at DCCT Baseline and Closeout stratified by disease status and DCCT Randomized Treatment group.**

| Measure                        | Disease Progression (groups are not mutually exclusive) |                         |                          |
|--------------------------------|---------------------------------------------------------|-------------------------|--------------------------|
|                                | Persistently Normal                                     | Macroalbuminuria        | Chronic Kidney Disease   |
| <b>INTENSIVE TREATMENT ARM</b> | (n=180)                                                 | (n=12)                  | (n=7)                    |
| Overall                        | --                                                      | 1.63 (1.03,2.59)        | <b>2.15 (1.10, 4.19)</b> |
| Baseline DCCT                  | --                                                      | 1.28 (0.68,2.39)        | 1.59 (0.94,2.69)         |
| End of DCCT                    | --                                                      | <b>2.19 (1.14,4.19)</b> | <b>2.75 (1.05,7.22)</b>  |
| <b>STANDARD TREATMENT ARM</b>  | (n=149)                                                 | (n=38)                  | (n=19)                   |
| Overall                        | --                                                      | 1.01 (0.85,1.20)        | 1.31 (1.00, 1.73)        |
| Baseline DCCT                  | --                                                      | 1.03 (0.80,1.31)        | 1.29 (0.79,2.13)         |
| End of DCCT                    | --                                                      | 1.01 (0.80,1.29)        | 1.35 (0.96,1.90)         |

Risk Ratios are adjusted for baseline disease cohort, sex, triglycerides, co measured eGFR, AER and the use of any ACE/ARB medications prior to disease progression.

Risk ratios are for a 1 standardized unit increase in ApoM and 95% confidence interval compared to persistently normal. The standard unit is measured in terms of a z-score.
